# Supplementary material
Source: PubMed Central journal article supplement (PMC1062888)

1 CGCGGGC  
 8 TTCCTGTGCG CGGCCGAGCC CGGGCCAGC GCCGCCTGCA GCCTCGGGAA GGGAGCGGAT  
 68 AGCGGAGCCC CGAGCCGCC GCAGAGCAAG CGCGGGAAAC CAAGGAGACG CTCCTGGCAC

Intron 1  
 \ 7577 nt /

128 TGCAGATAAC TTGTCTGCAT TTCAGAACA ACCTACCAGA GACCTTACCT <sup>A</sup>→ GTCACCTTGG

Intron 2      B  
 \ 3912 nt..ctgtcactccagctttataaccgc..35 nt /

188 CTCTCCCACC CAATGGAGAT GGCTCTAATG GTGGCACAAA CCAGGAAGGG GAAATCTGTG  
 ⇐ ⇨

248 GTTTAAATTC TTTATGCCTC ATCCTCTGAG TGCTGAAGGC TTGCTGTAGG CTGTATGCTG

----- miR-155 -----

308 TTAATGCTAA TCGTGATAGG GGTTTTTGCC TCCAAGTAC TCCTACATAT TAGCATTAACT

368 AGTGTATGAT GCCTGTTACT AGCATTACACA TGGAACAAAT TGCTGCCGTG GGAGGATGAC

428 AAAGAAGCAT GAGTACCCT GCTGGATAAA CTTAGACTTC AGGCTTTATC ATTTTTCAAT

488 CTGTTAATCA TAATCTGGTC ACTGGGATGT TCAACCTTAA ACTAAGTTTT GAAAGTAAGG

548 TTATTTAAAA GATTTATCAG TAGTATCCTA AATGCAAACA TTTTCATTTA <sup>C</sup>← AATGTCAAGC

608 CCATGTTTGT TTTTATCATT AACAGAAA**AAAT** **ATA**TTTCATGT CATTCCTAAT TGCAGGTTTT  
 ⇐

668 GGCTTGTTCA TTATAATGTT CATAAACACC TTTGATTCAA CTGTTAGAAA TGTGGGCTAA  
 728 ACACAAATTT CTATAATATT TTTGTAGTTA AAAATTAGAA GGACTACTAA CCTCCAGTTA  
 788 TATCATGGAT TGTCTGGCAA CGTTTTTTAA AAGATTTAGA AACTGGTACT TTCCCCCAGG  
 848 TAACGATTTT CTGTTTCAGG AACTTCAGTT TAAAATTAAT ACTTTTATTT GACTCTTAAA  
 908 GGGAAACTGA AAGGCTATGA AGCTGAATTT TTTTAATGAA ATATTTTTAA CAGTTAGCAG  
 968 GGTAAATAAC ATCTGACAGC TAATGAGATA TTTTTCAT ACAAGATAAA **AAGATTTAAT**  
 1028 **CAAAAATTT** ATATTTGAAA TGAAGTCCCA AATCTAGGTT CAA**GTT**CAAT AGCTTAGCCA  
 1088 CATAATACGG TTGTGCGAGC AGAGAATCTA CCTTCCACT TCTAAGCCTG TTTCTTCCTC  
 1148 CATAAATGG GGATAATACT TTACAAGGTT GTTGTGAGGC TTAGATGAGA TAGAGAATTA  
 1208 TTCCATAAGA TAATCAAGTG CTACATTAAT GTTATAGTTA GATTAATCCA AGAACTAGTC  
 1268 ACCCTACTTT ATTAGAGAAG AGAAAAGCTA ATGATTTGAT TTGCAGAATA TTTAAGGTTT  
 1328 GGATTTCTAT GCAGTTTTTC TAAATAACCA TCACTTACAA ATATGTAACC AAACGTAATT  
 1388 GTTAGTATAT TTAATGTAAA CTTGTTTTAA CAACTCTTCT CAACATTTTG TCCAGGTTAT  
 1448 TCACTGTAAC CA**ATAAA**TC TCATGAGTCT TTAGTTGATT T

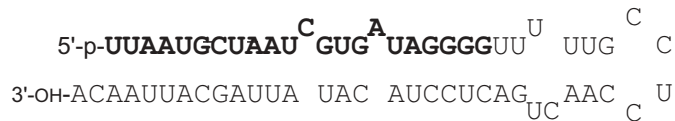

Supplement: pnas_102_10_3627__1.pdf [file pnas_102_10_3627__1.pdf]
