# Supplementary material
Source: PubMed Central journal article supplement (PMC1062888)

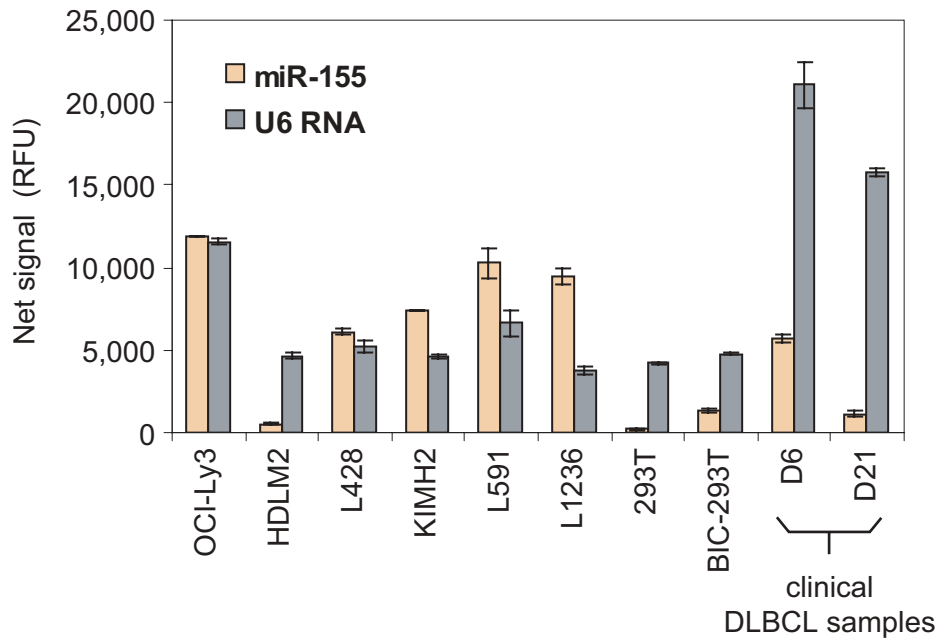

Supplement: pnas_102_10_3627__4.pdf [file pnas_102_10_3627__4.pdf]

**A**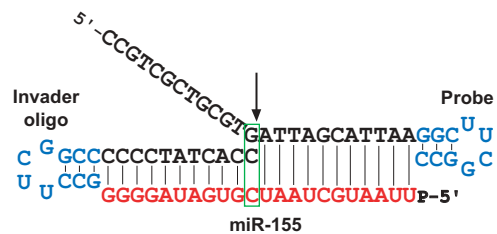**B**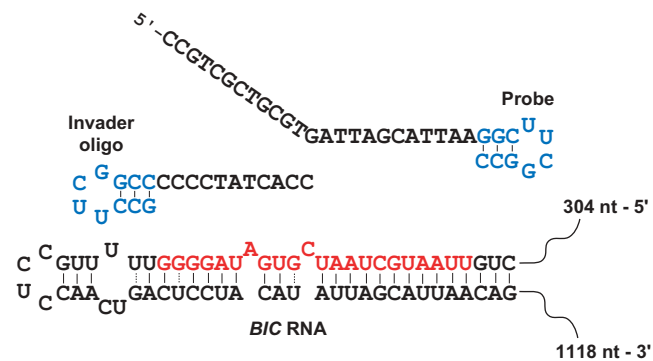**C**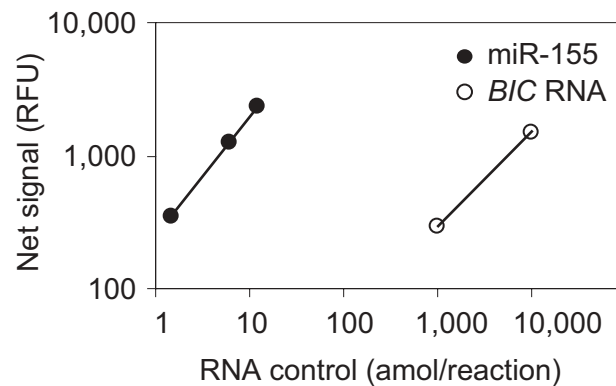

Supplement: pnas_102_10_3627__5.pdf [file pnas_102_10_3627__5.pdf]

A

miR-155 target: PU.1 transcription factor mRNA

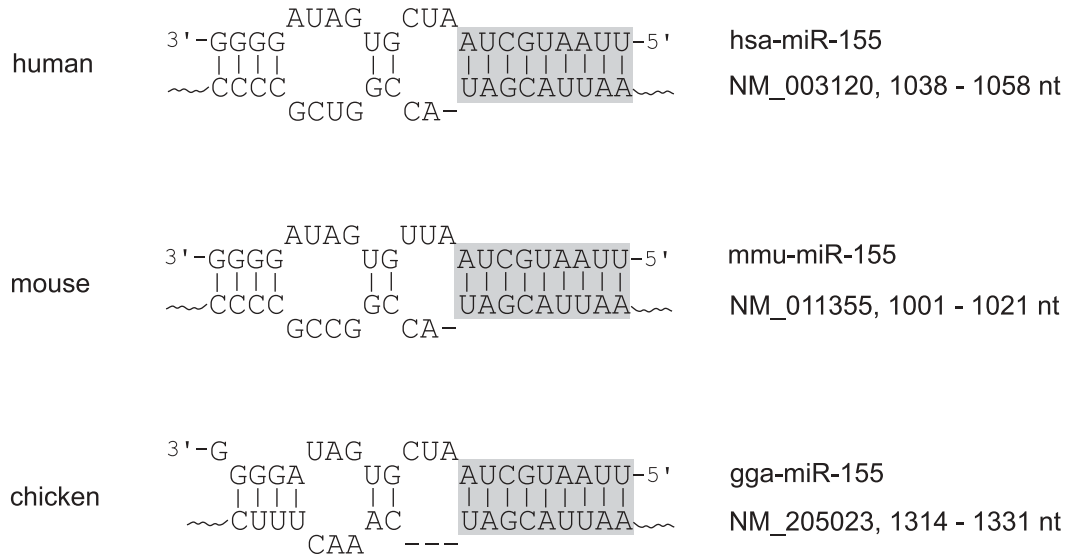

B

miR-155 target: CEBPB transcription factor mRNA

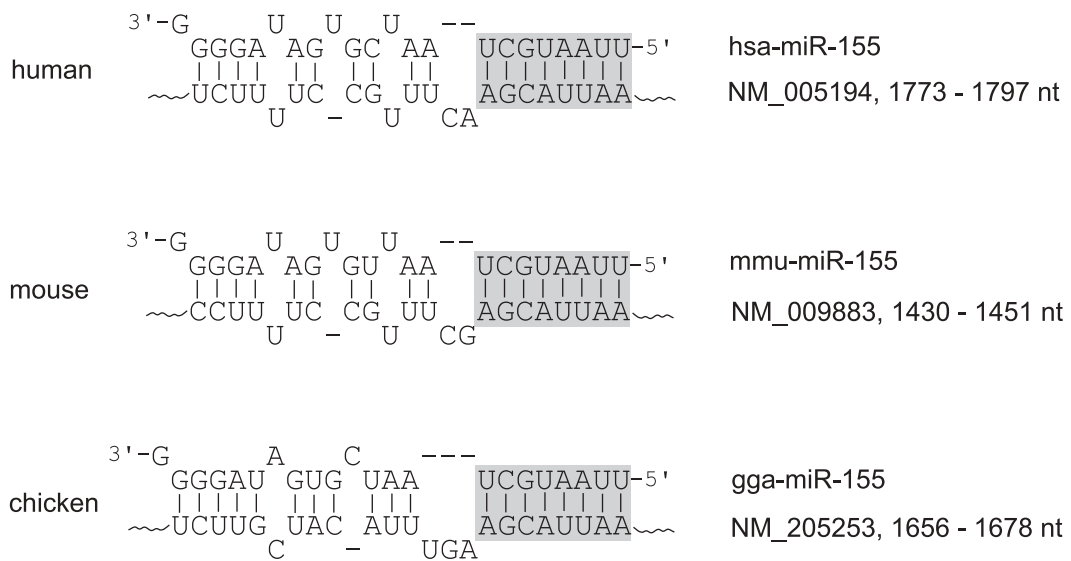

Supplement: pnas_102_10_3627__8.pdf [file pnas_102_10_3627__8.pdf]

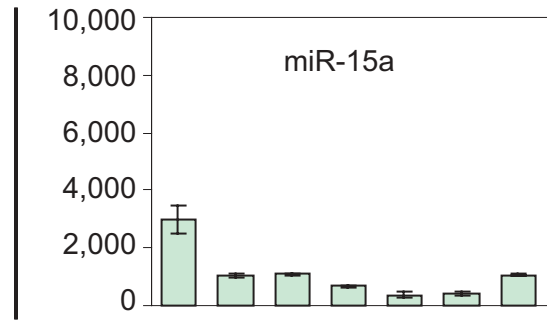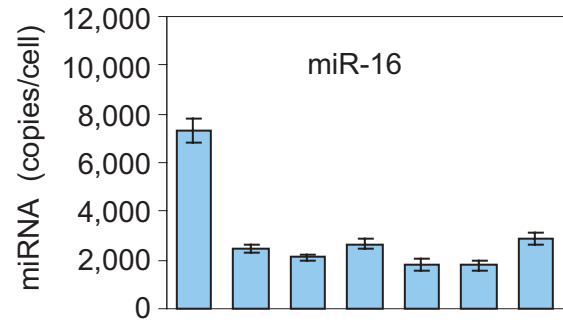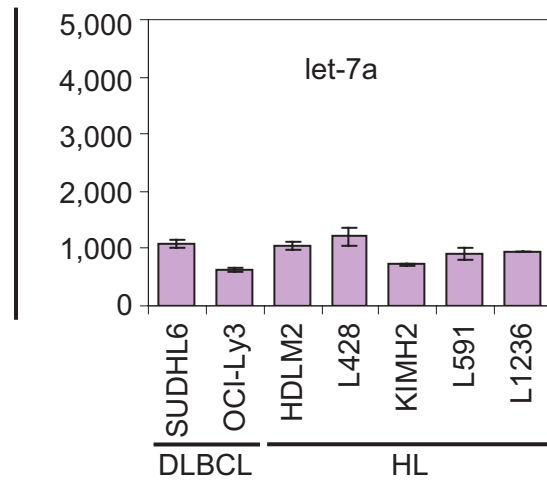

Supplement: pnas_102_10_3627__9.pdf [file pnas_102_10_3627__9.pdf]
